# Supplementary material for: Protective Effect of Intestinal Helminthiasis Against Tuberculosis Progression Is Abrogated by Intermittent Food Deprivation
Source: PubMed Central journal article supplement (PMC8079633; doi:10.3389/fimmu.2021.627638), 2021-04-14
Supplement: Image_1.pdf [file Image_1.pdf]

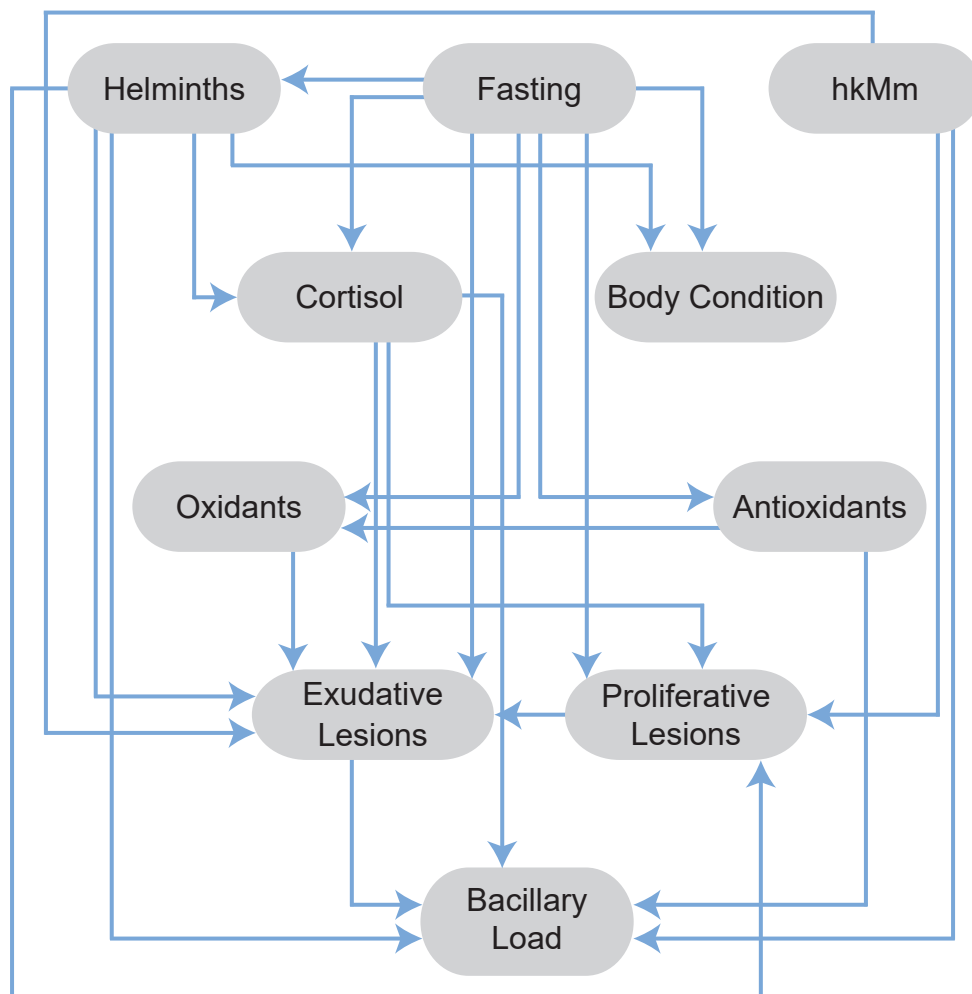

**Supplementary figure 1:** Initial model, each arrow indicates an assumed relation between the latent variables.
