# Supplementary material for: Protective Effect of Intestinal Helminthiasis Against Tuberculosis Progression Is Abrogated by Intermittent Food Deprivation
Source: PubMed Central journal article supplement (PMC8079633; doi:10.3389/fimmu.2021.627638), 2021-04-14
Supplement: Image_3.pdf [file Image_3.pdf]

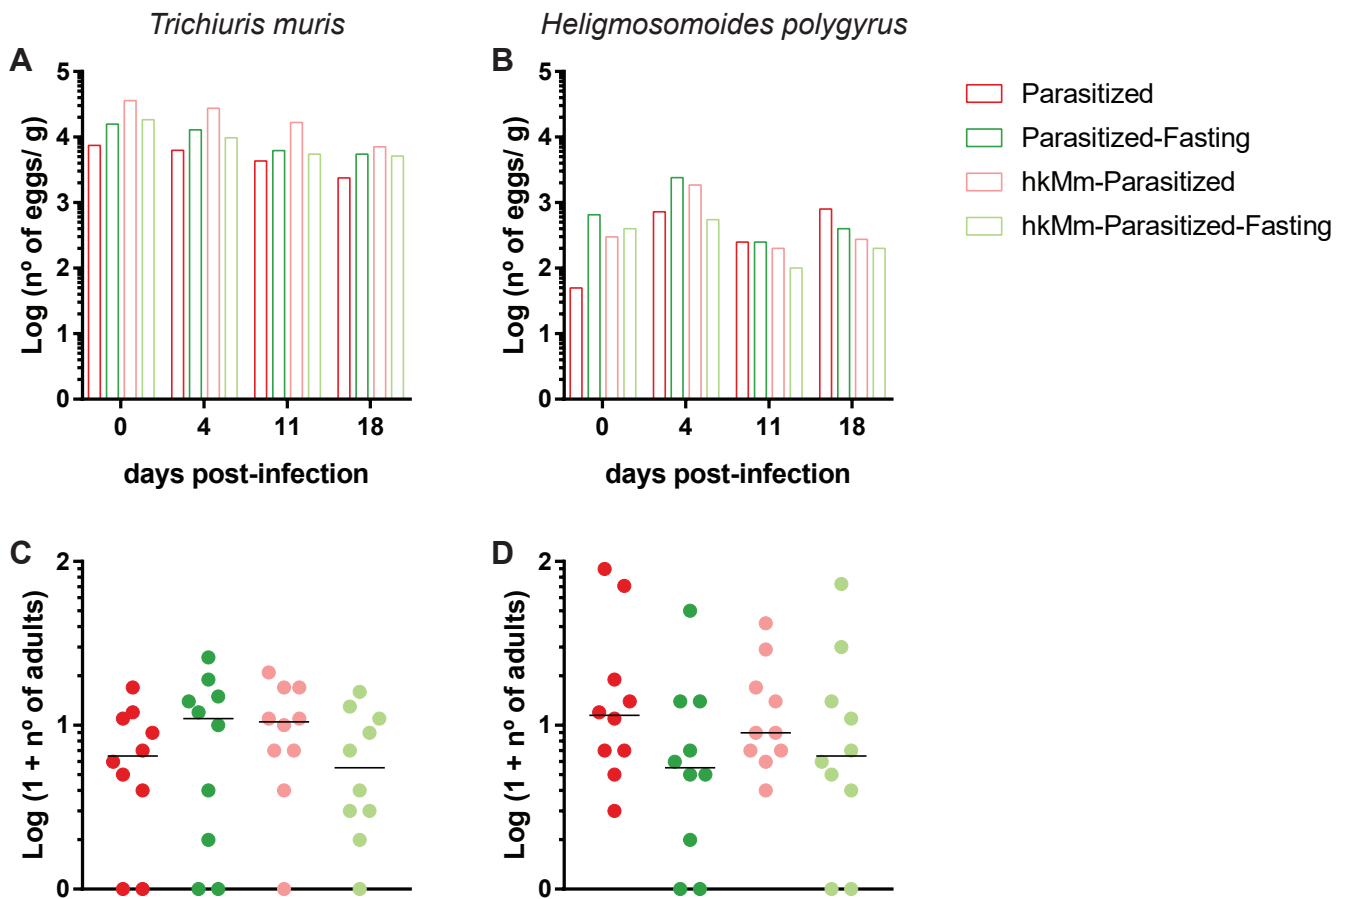

**Supplementary figure 3:** Recount of helminth eggs in faeces during the experiment (A-B, bars represent means of 2 cages) and adult parasites in intestines at final endpoint (C-D, each circle represents an animal and lines are medians). A and C correspond to *T. muris* and B and D are *H. polygyrus*.
