# Supplementary material for: Protective Effect of Intestinal Helminthiasis Against Tuberculosis Progression Is Abrogated by Intermittent Food Deprivation
Source: PubMed Central journal article supplement (PMC8079633; doi:10.3389/fimmu.2021.627638), 2021-04-14
Supplement: Image_4.pdf [file Image_4.pdf]

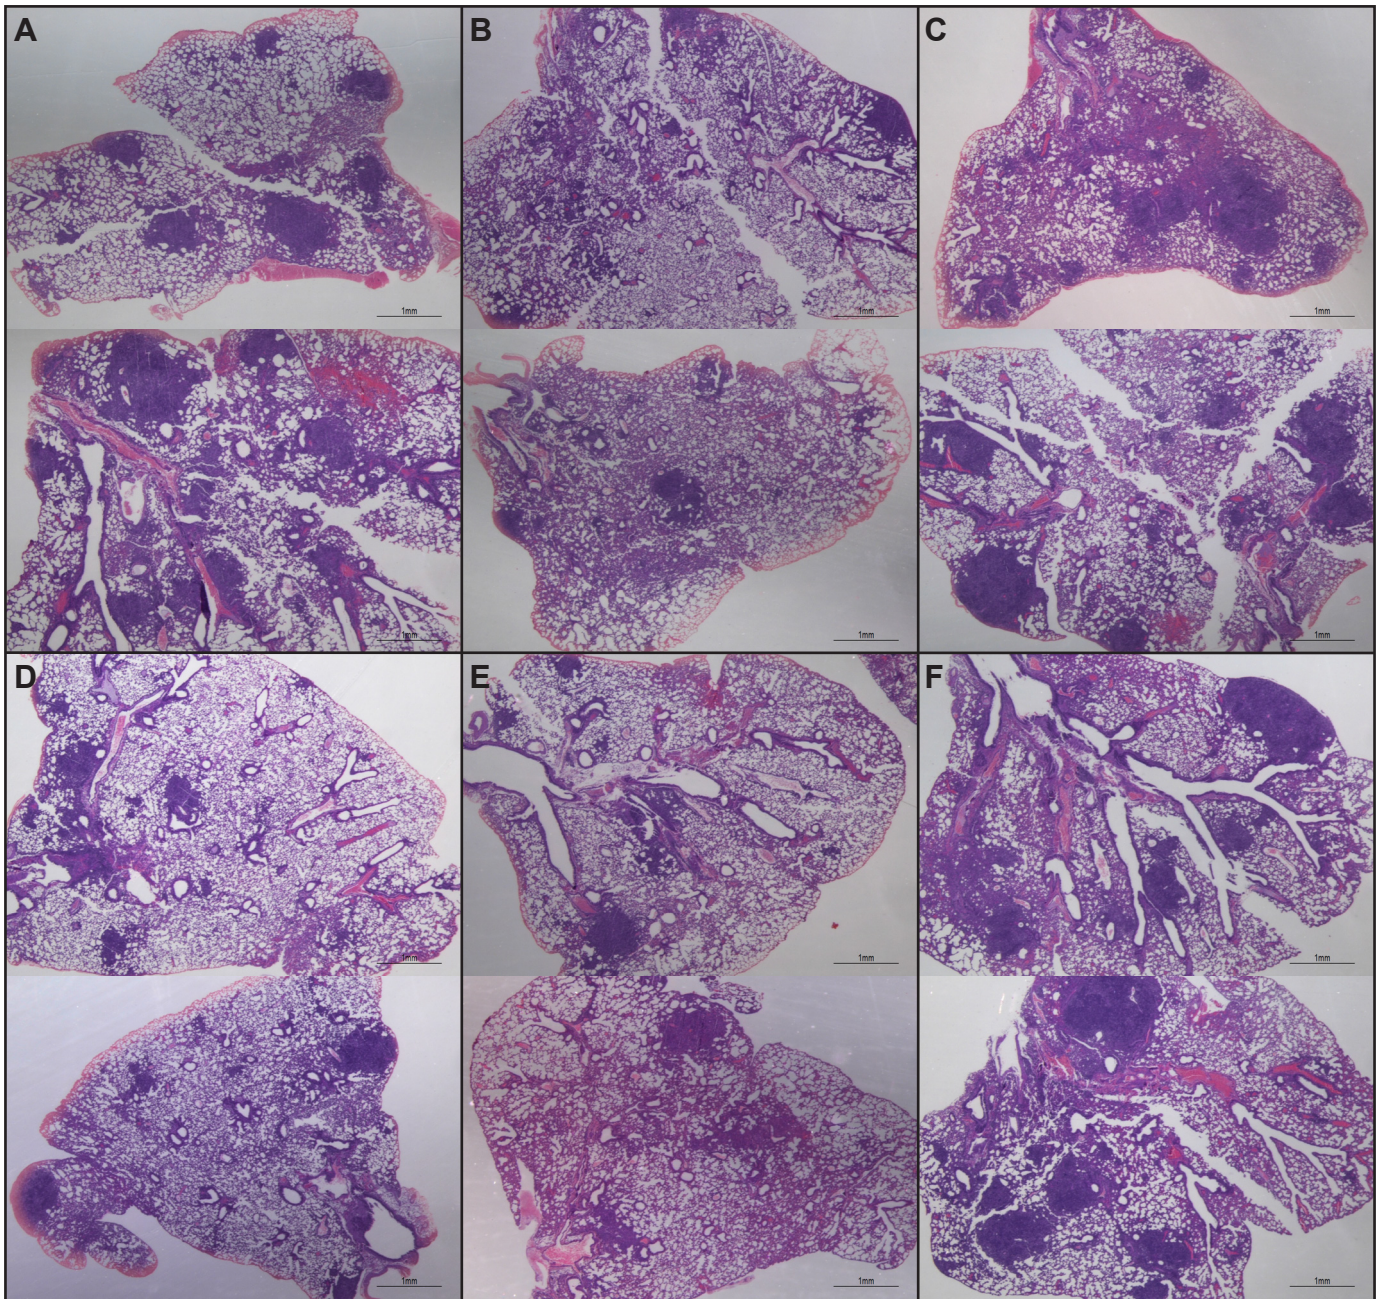

**Supplementary figure 4:** Representative HE stained lung sections from each experimental group at week 3 post-infection. Lines represent 1 mm. (A) Control, (B) Parasitized, (C) Parasitized-Fasting, (D) hkMm, (E) hkMm-Parasitized, (F) hkMm-Parasitized-Fasting. hkMm: heat-killed *M. manresensis*.
