# Supplementary material for: Protective Effect of Intestinal Helminthiasis Against Tuberculosis Progression Is Abrogated by Intermittent Food Deprivation
Source: PubMed Central journal article supplement (PMC8079633; doi:10.3389/fimmu.2021.627638), 2021-04-14
Supplement: Image_5.pdf [file Image_5.pdf]

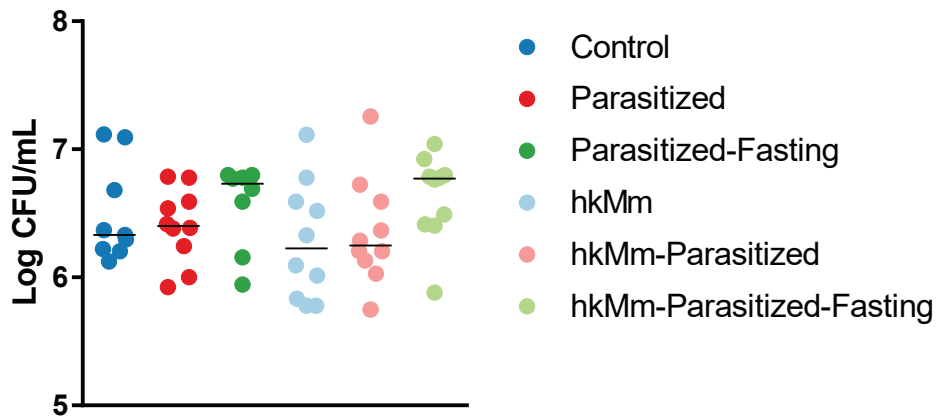

**Supplementary figure 5:** Spleen bacillary load at week 3 post-infection. Each circle represents an animal and lines are medians. Mann-Whitney test.
