# Supplementary material for: Protective Effect of Intestinal Helminthiasis Against Tuberculosis Progression Is Abrogated by Intermittent Food Deprivation
Source: PubMed Central journal article supplement (PMC8079633; doi:10.3389/fimmu.2021.627638), 2021-04-14
Supplement: Image_7.pdf [file Image_7.pdf]

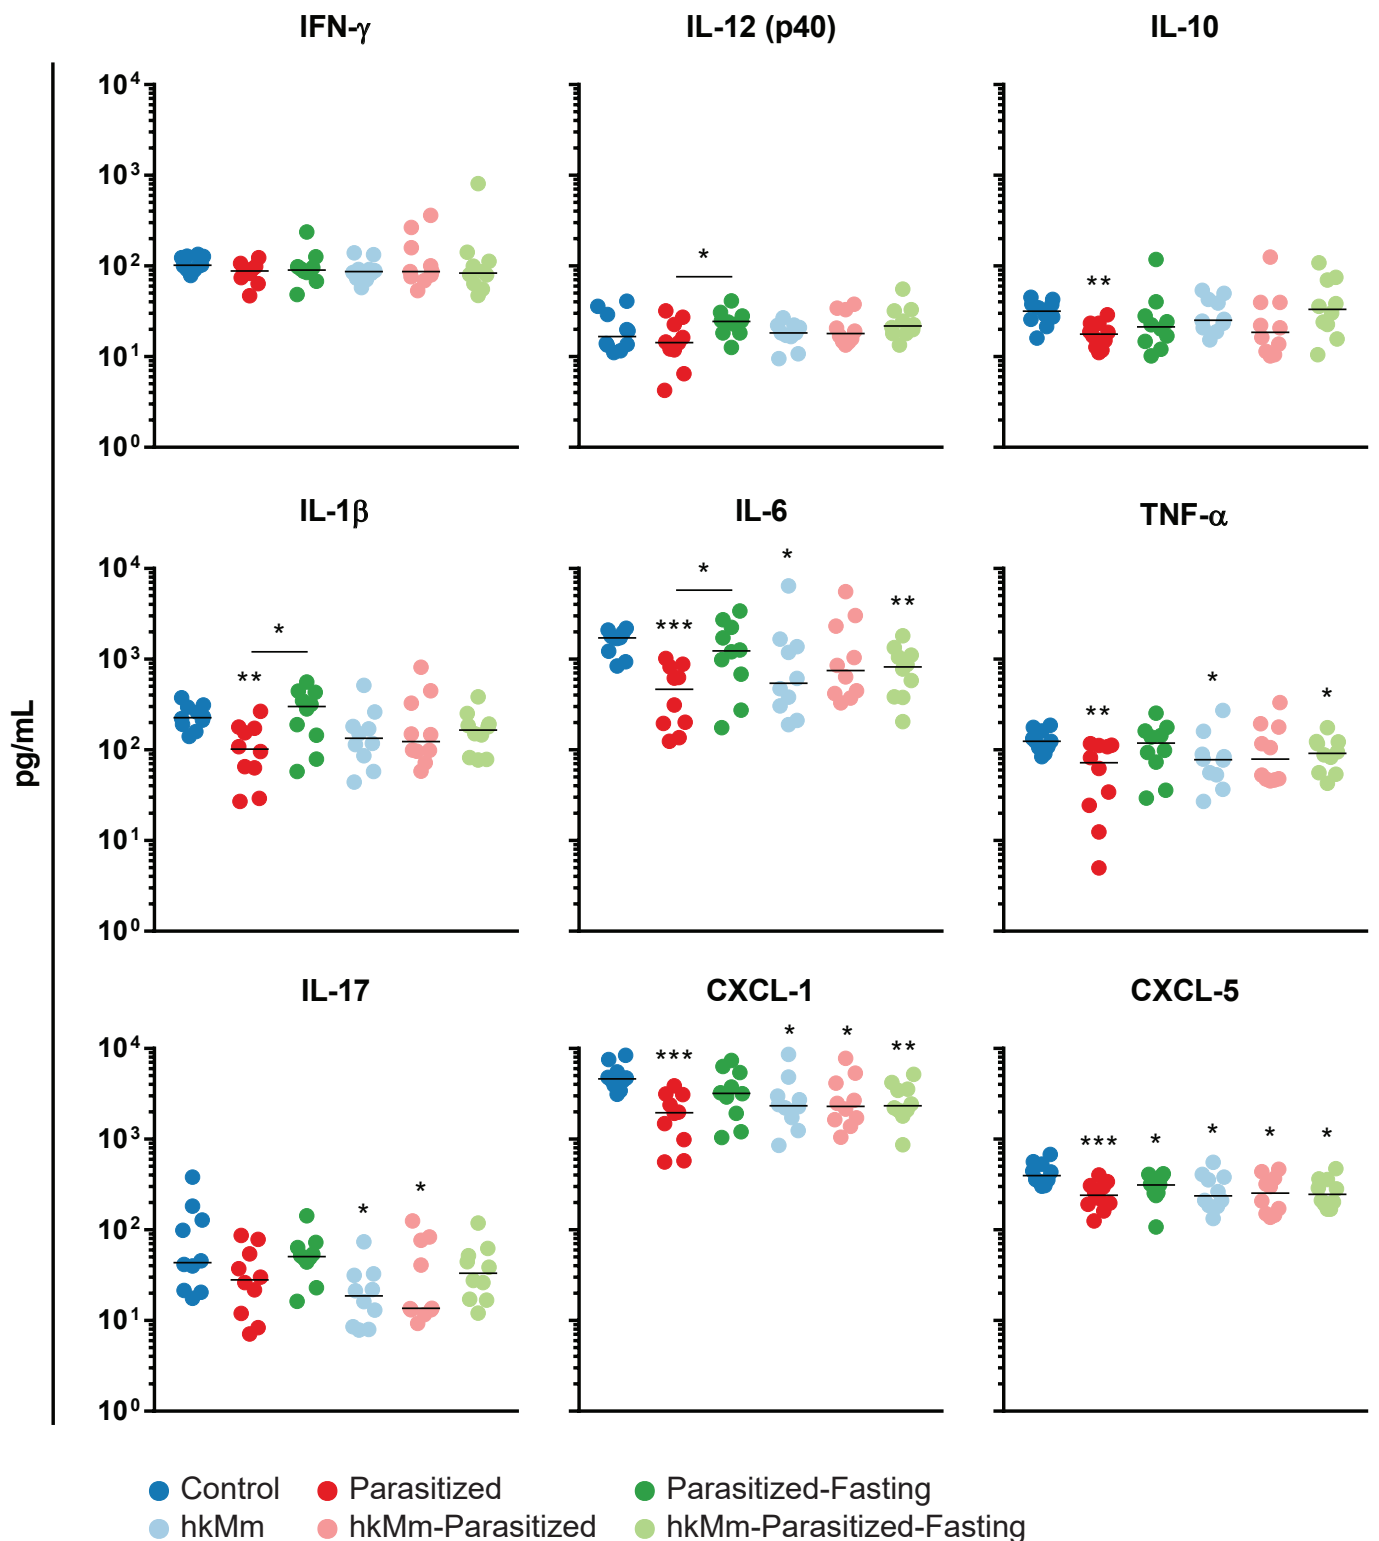

**Supplementary figure 7:** Immune mediators in lung homogenates at week 3 post-infection. Each circle represents an animal and lines are medians, Mann-Whitney test (\* $p < 0.05$ , \*\* $p < 0.01$ , \*\*\* $p < 0.001$ ). hkMm: heat-killed *M. manresensis*.
