# Supplementary material for: Protective Effect of Intestinal Helminthiasis Against Tuberculosis Progression Is Abrogated by Intermittent Food Deprivation
Source: PubMed Central journal article supplement (PMC8079633; doi:10.3389/fimmu.2021.627638), 2021-04-14
Supplement: Table_1.pdf [file Table_1.pdf]

**Supplementary table 1:** Description of both latent and manifest variables used for the model.

| Latent variable                          | Manifest variable                                                                             | Descriptive statistics <sup>1</sup>      |
|------------------------------------------|-----------------------------------------------------------------------------------------------|------------------------------------------|
| Fasting                                  | Categorical variable with two modalities:<br>0 = not food deprivation<br>1 = food deprivation | 0.333 ± 0.475 (0 - 1)                    |
| Heat-killed <i>M. manresensis</i> (hkMm) | Categorical variable with two modalities:<br>0 = mannitol treatment<br>1 = hkMm treatment     | 0.5 ± 0.504 (0 - 1)                      |
| Helminths                                | <i>Heligmosomoides polygyrus</i>                                                              | 10.00 ± 18.394 (0.00 - 89.00)            |
|                                          | <i>Trichuris muris</i>                                                                        | 6.367 ± 7.474 (0.00 - 30.000)            |
| Cortisol                                 | Cortisol                                                                                      | 1.289 ± 0.544 (0.408 - 2.870)            |
| Body condition                           | Liver weight                                                                                  | 1.449 ± 0.274 (0.881 - 1.995)            |
|                                          | Kidneys weight                                                                                | 0.460 ± 0.153 (0.037 - 0.818)            |
| Anti-oxidants                            | FRAP                                                                                          | 0.949 ± 0.155 (0.571 - 1.353)            |
|                                          | TIOL                                                                                          | 0.315 ± 0.077 (0.129 - 0.452)            |
|                                          | CUPRAC                                                                                        | 0.539 ± 0.072 (0.369 - 0.719)            |
|                                          | TEAC2                                                                                         | 1.083 ± 0.053 (0.946 - 1.215)            |
|                                          | TEAC1                                                                                         | 0.737 ± 0.087 (0.525 - 0.943)            |
|                                          | PON1                                                                                          | 10.214 ± 1.569 (7.230 - 12.930)          |
| Oxidants                                 | ROS                                                                                           | 363.0 ± 78.063 (219.0 - 582.0)           |
|                                          | AOPP                                                                                          | 128.64 ± 46.495 (37.80 - 293.40)         |
| Proliferative lesions                    | IL-10                                                                                         | 31.03 ± 24.357 (10.16 - 125.35)          |
|                                          | IL-12(p40)                                                                                    | 21.29 ± 9.487 (4.26 - 55.42)             |
|                                          | IFN-γ                                                                                         | 101.22 ± 51.037 (46.83 - 361.52)         |
| Exudative lesions                        | IL-1β                                                                                         | 202.78 ± 148.678 (27.00 - 813.98)        |
|                                          | IL-6                                                                                          | 1202.9 ± 1181.824 (124.0 - 6417.7)       |
|                                          | TNF-α                                                                                         | 103.94 ± 63.827 (4.98 - 331.91)          |
|                                          | CXCL5                                                                                         | 302.7 ± 123.245 (107.4 - 678.0)          |
|                                          | IL-17                                                                                         | 49.32 ± 57.635 (7.12 - 382.12)           |
|                                          | CXCL1                                                                                         | 3252.5 ± 1986.255 (558.5 - 8580.7)       |
|                                          | ADA                                                                                           | 18.25 ± 4.315 (11.78 - 28.27)            |
|                                          | Haptoglobin                                                                                   | 1.921 ± 0.668 (0.430 - 3.070)            |
| Bacillary load                           | Lung                                                                                          | 14064125 ± 13072975 (2400000 - 73000000) |
|                                          | Spleen                                                                                        | 4061116 ± 3546899 (560000 - 18000000)    |

<sup>1</sup>Mean ± SD (Range).

ADA: adenosine deaminase, AOPP: advanced oxidation protein products, CUPRAC: cupric reducing antioxidant capacity, FRAP: ferric reducing antioxidant power, hkMm: heat-killed *M. manresensis*, PON1: paraoxonase 1, ROS: reactive oxygen species, TEAC: trolox equivalent antioxidant capacity.
