# Supplementary material for: Protective Effect of Intestinal Helminthiasis Against Tuberculosis Progression Is Abrogated by Intermittent Food Deprivation
Source: PubMed Central journal article supplement (PMC8079633; doi:10.3389/fimmu.2021.627638), 2021-04-14
Supplement: Table_2.pdf [file Table_2.pdf]

**Supplementary table 2:** Direct effects expected between latent variables.

| Latent variable                          | Direct effects on LVs                                                                                                             | References                                                                                                                                                                                                                                                                                                                                    |
|------------------------------------------|-----------------------------------------------------------------------------------------------------------------------------------|-----------------------------------------------------------------------------------------------------------------------------------------------------------------------------------------------------------------------------------------------------------------------------------------------------------------------------------------------|
| Fasting                                  | Resource limitation could affect helminths, cortisol, body condition, oxidants, antioxidants, proliferative and exudative lesions | Budischak et al., 2015 Int. J. Parasitol 45 (7): 455-463<br>Budischak et al., 2018 Front. Immunol. 8:1914<br>Budischak et al., 2018 Front. Immunol. 9:2453.<br>Beldomenico et al., 2008 Proc. R. Soc. B 275:1753-1759<br>Dang et al., 2014 PLoS ONE 9(10)<br>Rowland, 2007 CM 57(2):149-160<br>Sinha et al., 2019 J. Infect. Dis. 219:1356–63 |
| Heat-killed <i>M. manresensis</i> (hkMm) | hkMm could affect proliferative and exudative lesions, and bacillary load                                                         | Cardona et al., 2016 Front. Microbiol. 6:1482<br>Tukvadze et al., 2016 Int J Mycobacteriol 5(S1):S101-S102                                                                                                                                                                                                                                    |
| Helminths                                | Infection with helminths could affect body condition, cortisol, exudative and proliferative lesions, and bacillary load           | Fenton, 2013 Parasitology 140: 1119–1132<br>Maizels et al., 2004 Immunol. Rev. 201:89-116<br>Mishra et al., 2014 Mucosal Immunol 7(4)<br>Mutapi, 2015 Trends Parasitol. 31(9):405-6<br>Weinstock, 2014 Clinic Rev Allerg Immunol 49:227–231                                                                                                   |
| Cortisol                                 | Cortisol could affect exudative and proliferative lesions, and bacillary load                                                     | Bongiovanni et al., 2015 Tuberculosis 95:562-569                                                                                                                                                                                                                                                                                              |
| Body condition                           |                                                                                                                                   |                                                                                                                                                                                                                                                                                                                                               |
| Anti-oxidants                            | Anti-oxidants could affect oxidants and bacillary load                                                                            | Lu et al., 2013 Free Radic. Biol. Med. 66:75-87<br>Mohod et al., 2011 J. Exp. Sci., 2(6): 35-37<br>Nandi et al., 2009 Immunobiology 215:443–451                                                                                                                                                                                               |
| Oxidants                                 | Oxidants could affect exudative lesions                                                                                           | Nadeem et al., 2018 Biomed. Pharmacother.107:1196–1204                                                                                                                                                                                                                                                                                        |
| Proliferative lesions                    |                                                                                                                                   |                                                                                                                                                                                                                                                                                                                                               |
| Exudative lesions                        | Exudative lesions could affect bacillary load                                                                                     | Cardona, 2015 Front Microbiol. 6:612                                                                                                                                                                                                                                                                                                          |
| Bacillary load                           |                                                                                                                                   |                                                                                                                                                                                                                                                                                                                                               |
