# Supplementary material for: Protective Effect of Intestinal Helminthiasis Against Tuberculosis Progression Is Abrogated by Intermittent Food Deprivation
Source: PubMed Central journal article supplement (PMC8079633; doi:10.3389/fimmu.2021.627638), 2021-04-14
Supplement: Table_4.pdf [file Table_4.pdf]

**Supplementary table 4:** Results of the initial inner model, summarizing the relationships between each latent variable (LV) and its block of indicators. The output shows the coefficient estimates of each indicator of the LV, standard error, the t-value associated with testing the significance of the parameter listed in the first column and  $\Pr(>|t|)$  that gives you the p-value for that t-test.

|                              | Estimate  | Std. Error | t-value   | $\Pr(> t )$ |
|------------------------------|-----------|------------|-----------|-------------|
| <b>Helminths</b>             |           |            |           |             |
| Intercept                    | 3.98E-16  | 0.124      | 3.22E-15  | 1           |
| Fasting                      | 3.38E-01  | 0.124      | 2.74E+00  | 0.00817     |
| <b>Cortisol</b>              |           |            |           |             |
| Intercept                    | 2.32E-16  | 0.111      | 2.09E-15  | 1           |
| Fasting                      | 4.04E-01  | 0.118      | 3.43E+00  | 0.00112     |
| Helminths                    | 2.56E-01  | 0.118      | 2.18E+00  | 0.03369     |
| <b>Body condition</b>        |           |            |           |             |
| Intercept                    | -3.90E-16 | 0.0972     | -4.01E-15 | 1.00E+00    |
| Fasting                      | -6.02E-01 | 0.1033     | -5.83E+00 | 2.76E-07    |
| Helminths                    | -1.71E-01 | 0.1033     | -1.65E+00 | 1.04E-01    |
| <b>Anti-oxidants</b>         |           |            |           |             |
| Intercept                    | -5.47E-15 | 0.11       | -4.97E-14 | 1.00E+00    |
| Fasting                      | 5.45E-01  | 0.11       | 4.95E+00  | 6.71E-06    |
| <b>Oxidants</b>              |           |            |           |             |
| Intercept                    | -2.63E-15 | 0.114      | -2.30E-14 | 1           |
| Fasting                      | -1.37E-01 | 0.136      | -1.01E+00 | 0.31731     |
| Anti-oxidants                | -4.18E-01 | 0.136      | -3.07E+00 | 0.00329     |
| <b>Proliferative lesions</b> |           |            |           |             |
| Intercept                    | 4.05E-16  | 0.123      | 3.30E-15  | 1           |
| Fasting                      | 4.04E-01  | 0.144      | 2.81E+00  | 0.0069      |
| hkMm                         | 1.25E-01  | 0.129      | 9.67E-01  | 0.3377      |
| Helminths                    | -2.49E-01 | 0.138      | -1.81E+00 | 0.0764      |
| Cortisol                     | -1.67E-01 | 0.153      | -1.09E+00 | 0.2803      |
| <b>Exudative lesions</b>     |           |            |           |             |
| Intercept                    | -8.68E-17 | 0.13       | -6.68E-16 | 1           |
| Fasting                      | 5.90E-02  | 0.165      | 3.58E-01  | 0.7219      |
| hkMm                         | -2.37E-01 | 0.138      | -1.71E+00 | 0.0927      |
| Helminths                    | -7.36E-02 | 0.151      | -4.88E-01 | 0.6274      |
| Cortisol                     | -1.34E-01 | 0.173      | -7.74E-01 | 0.4422      |
| Oxidants                     | -7.22E-02 | 0.151      | -4.78E-01 | 0.6349      |
| Proliferative lesions        | 1.77E-01  | 0.143      | 1.24E+00  | 0.2204      |
| <b>Bacillary Load</b>        |           |            |           |             |
| Intercept                    | 2.29E-15  | 0.117      | 1.96E-14  | 1           |
| hkMm                         | -8.38E-02 | 0.125      | -6.73E-01 | 0.50389     |
| Helminths                    | -1.47E-01 | 0.13       | -1.13E+00 | 0.26248     |
| Cortisol                     | -1.55E-01 | 0.151      | -1.03E+00 | 0.30963     |
| Anti-oxidants                | 2.84E-01  | 0.14       | 2.03E+00  | 0.04737     |
| Exudative lesions            | 4.02E-01  | 0.12       | 3.34E+00  | 0.00154     |
